# Supplementary material for: Dermal Micro-coring for the Treatment of Moderate to Severe Facial Wrinkles
Source: PubMed Central journal article supplement — Plast Reconstr Surg Glob Open. 2022 Oct 17;10(10):e4547. doi: 10.1097/GOX.0000000000004547 (PMC9575956; doi:10.1097/gox.0000000000004547), 2022-10-17
Supplement: gox-10-e4547-s002.pdf [file gox-10-e4547-s002.pdf]

| Variable                            | All assessments | <i>P</i> value <sup>a</sup> |
|-------------------------------------|-----------------|-----------------------------|
| Least Squares Mean Side - Left      | 1.34            |                             |
| Least Squares Mean Side - Right     | 1.30            |                             |
| Difference between sides            | 0.04            | 0.664                       |
| Least Squares Mean - Reviewer 1     | 1.47            |                             |
| Least Squares Mean - Reviewer 2     | 1.45            |                             |
| Least Squares Mean - Reviewer 3     | 1.03            |                             |
| Difference between Reviewer 1 and 2 | 0.02            | 0.861                       |
| Difference between Reviewer 1 and 3 | 0.44            | <b>&lt;0.001</b>            |
| Difference between Reviewer 2 and 3 | 0.42            | <b>0.001</b>                |

<sup>a</sup> Bold *p* values indicate statistical significant differences.
