# Supplementary figures and images for: Dermal Micro-coring for the Treatment of Moderate to Severe Facial Wrinkles
Source: PubMed Central journal article supplement — Plast Reconstr Surg Glob Open. 2022 Oct 17;10(10):e4547. doi: 10.1097/GOX.0000000000004547 (PMC9575956; doi:10.1097/gox.0000000000004547), 2022-10-17

Day 7 Post Treatment 1

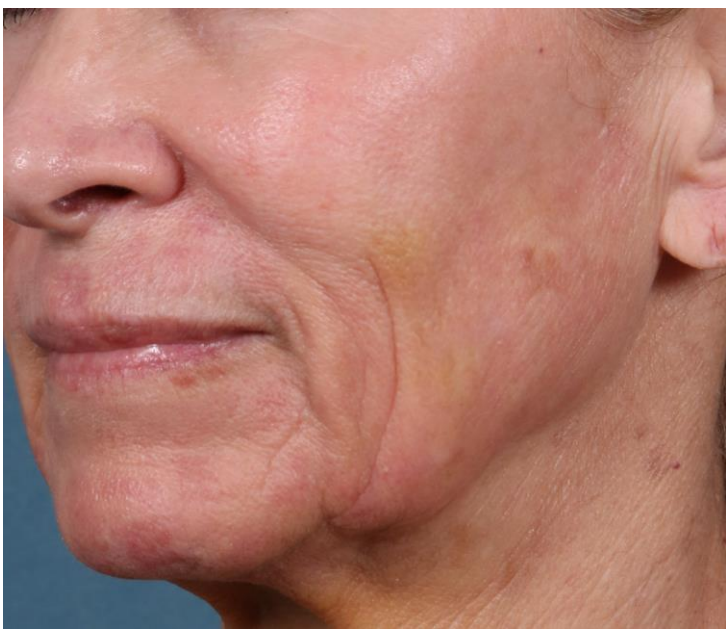

Day 7 Post Treatment 2

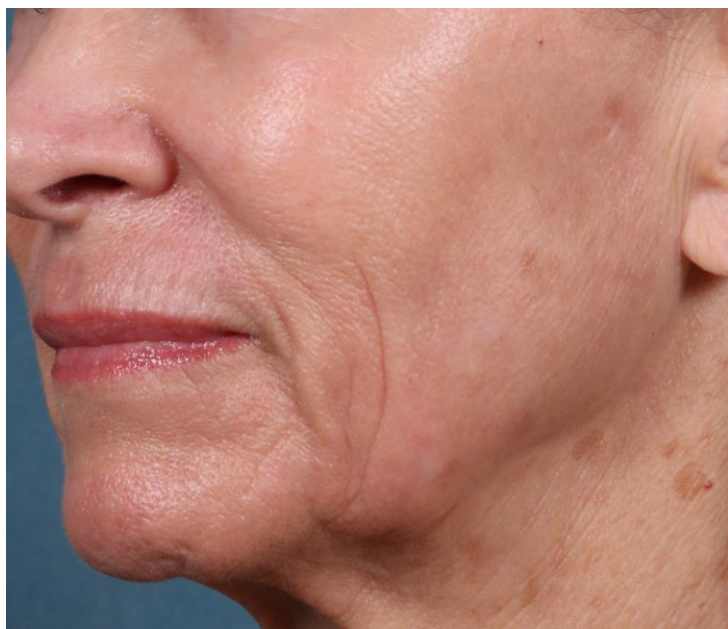

Day 7 Post Treatment 3

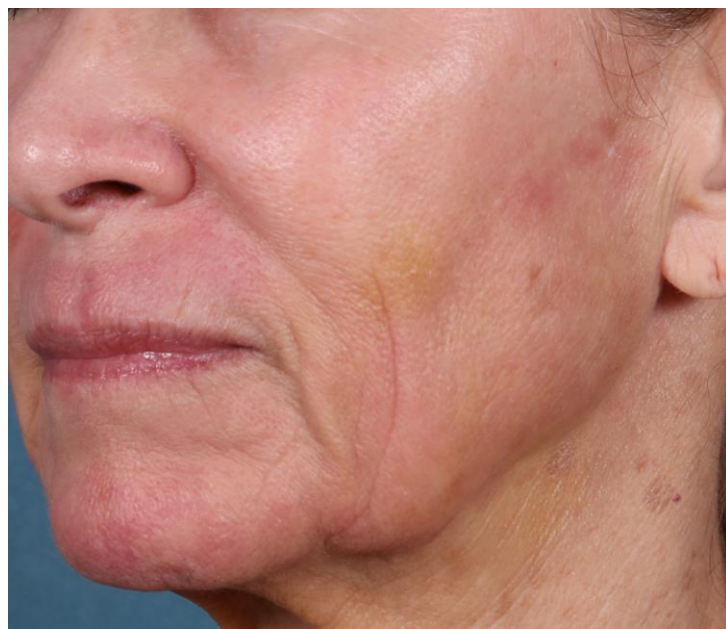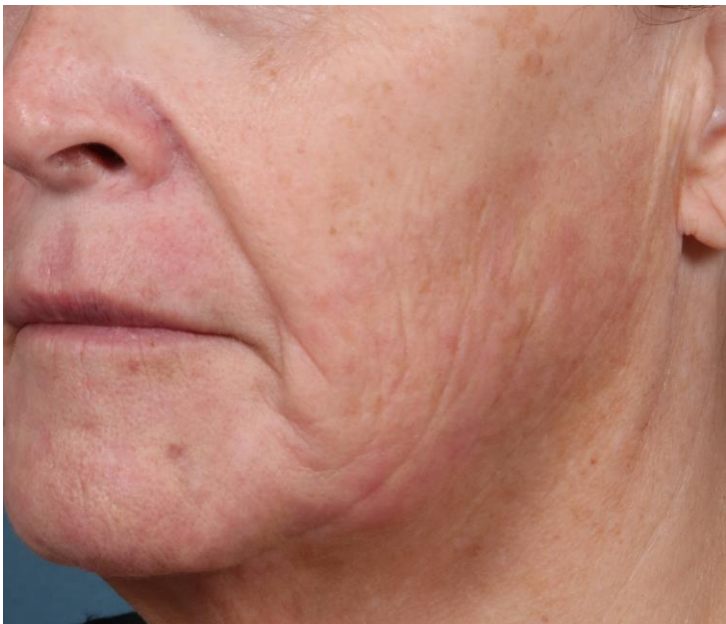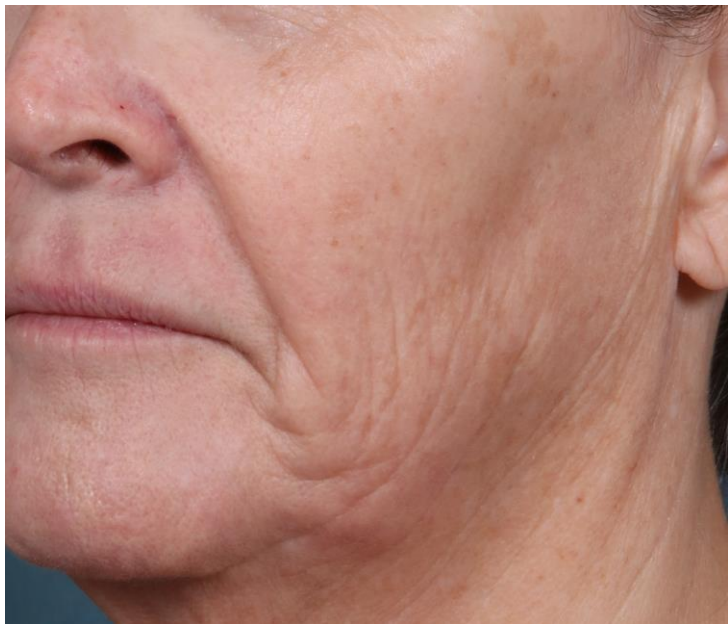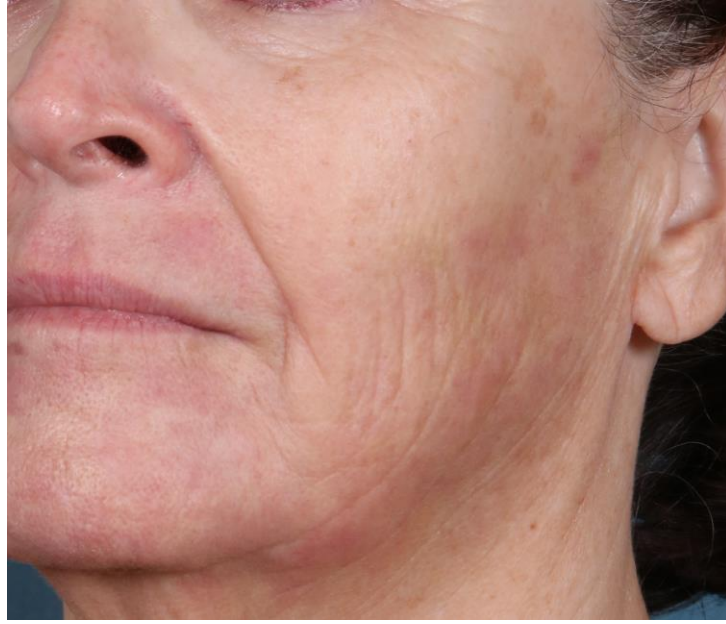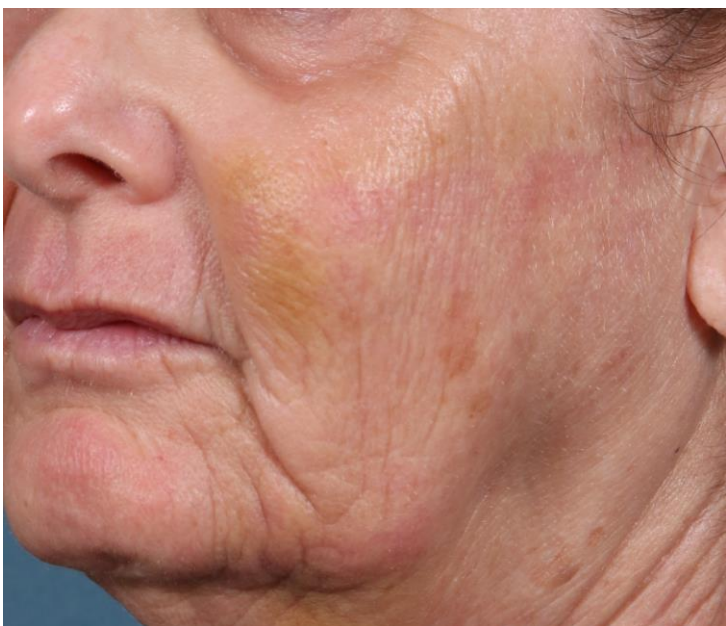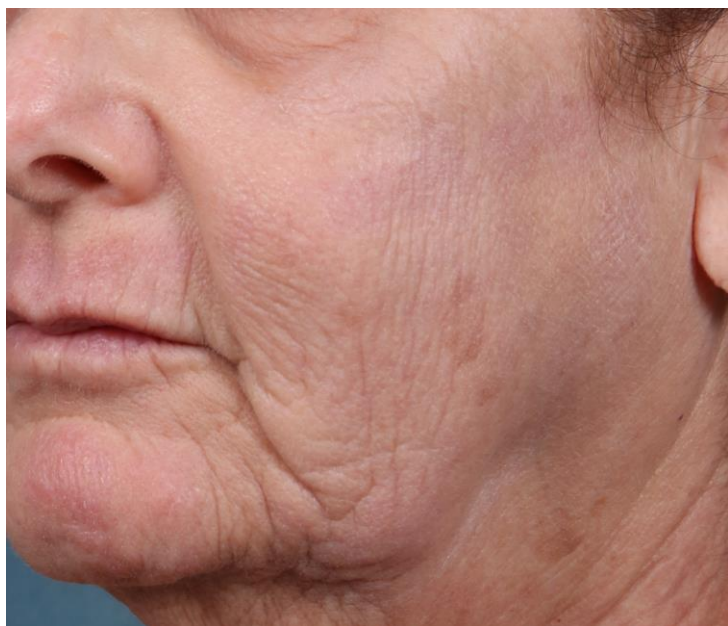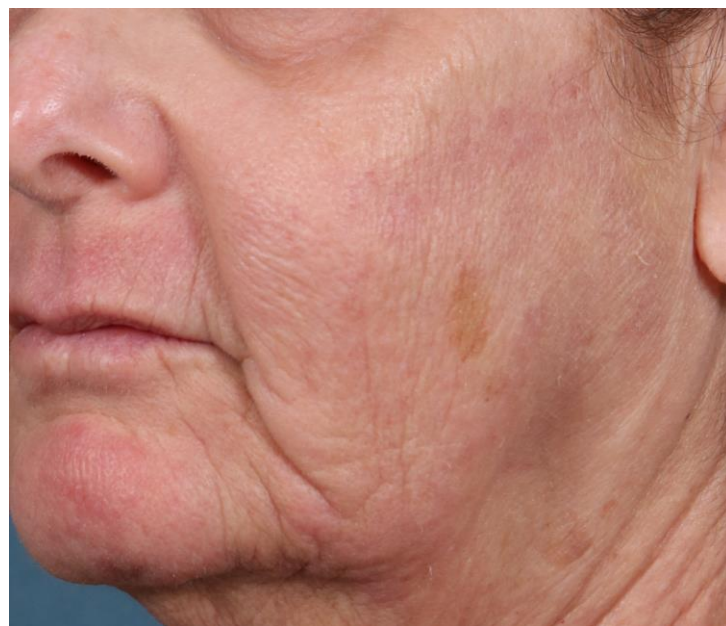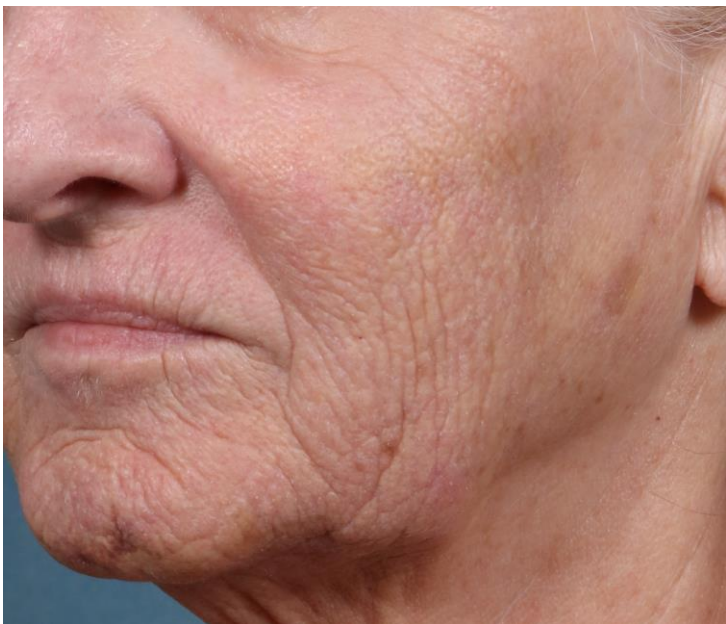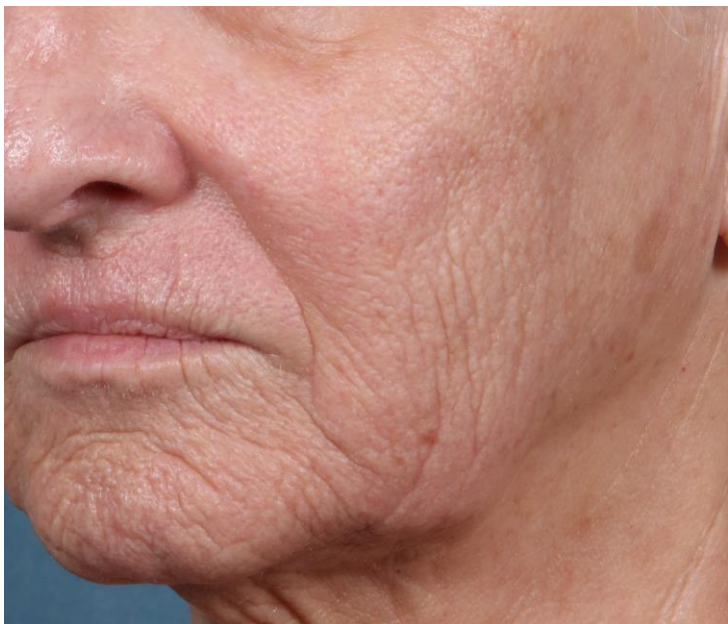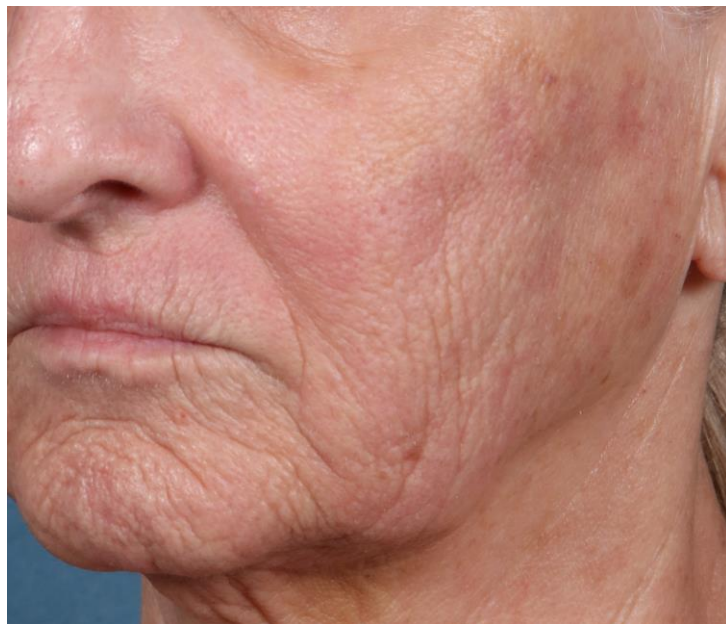

Supplement: gox-10-e4547-s003.pdf [file gox-10-e4547-s003.pdf]
